# Supplementary material
Source: Springer Nature journal article supplement (https://www.springermedizin.de/resource/supplementary/12985_2009_789_MOESM3_ESM.pdf/9609196)

**Mock**

**60 ng**

**120 ng**

**Huh7**

**Huh7D**

**Huh7.5**

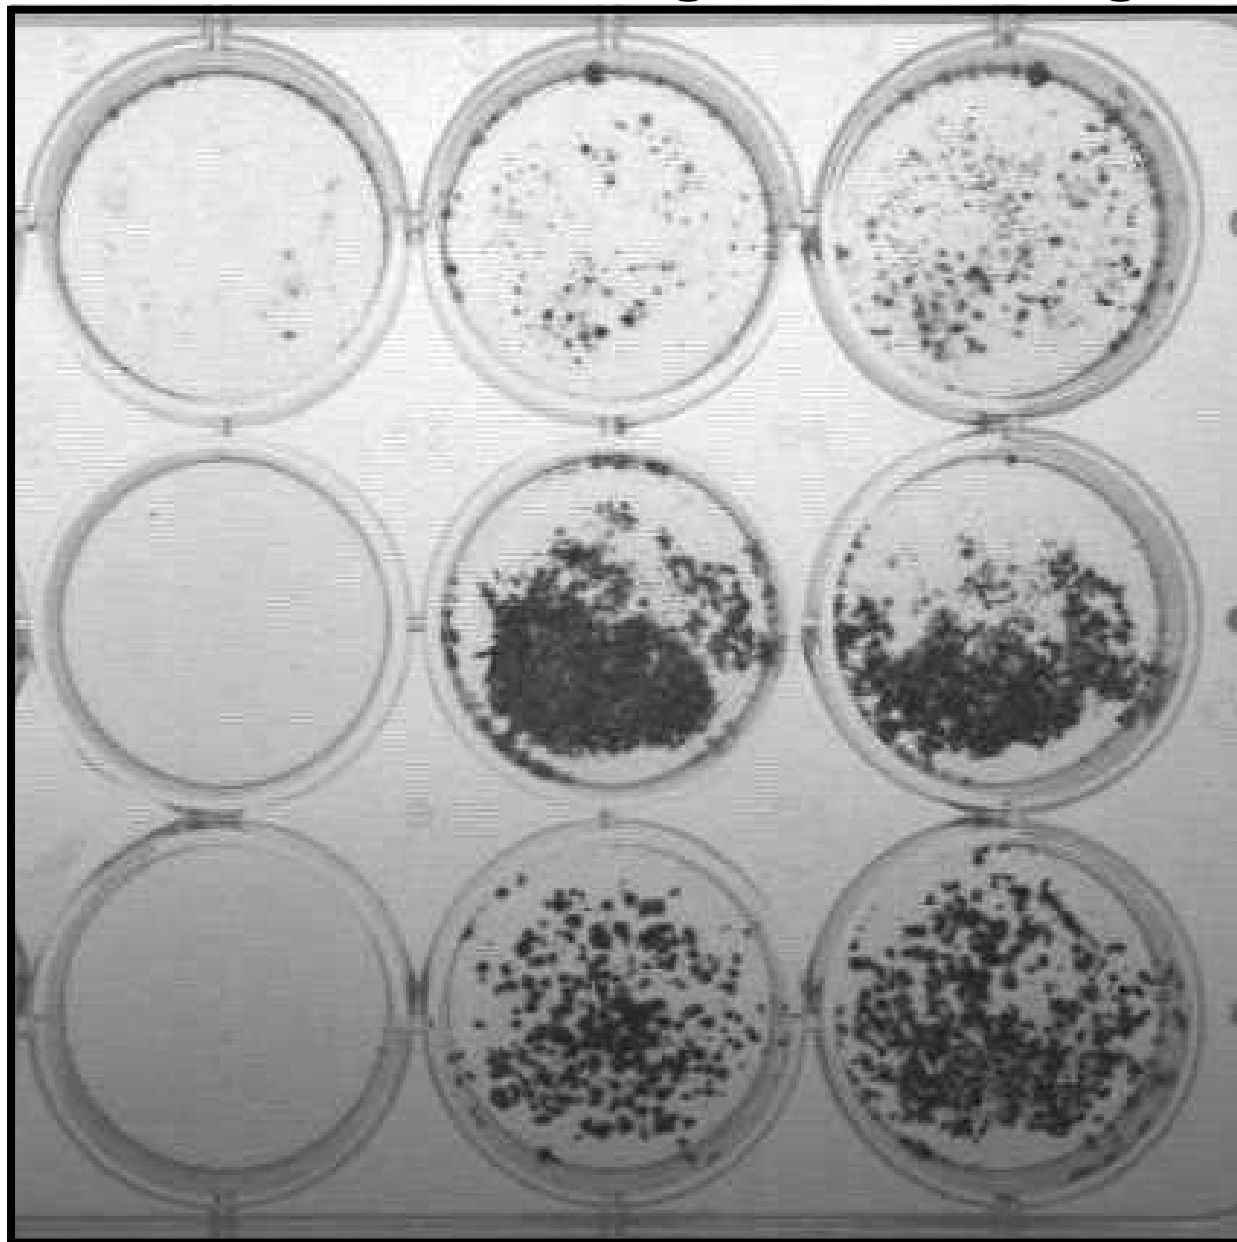

Supplement: MOESM3 [file 9609196]
